# Supplementary material for: Facile non-hydrolytic synthesis of highly water dispersible, surfactant free nanoparticles of synthetic MFe2O4 (M–Mn2+, Fe2+, Co2+, Ni2+) ferrite spinel by a modified Bradley reaction
Source: Royal Society of Chemistry journal article supplement (doi:10.1039/c3ra40763b), 2013-01-01
Supplement: c3ra40763b.pdf [file c3ra40763b.pdf]

# Facile non-hydrolytic synthesis of highly water dispersible, surfactant free nanoparticles of synthetic $MFe_2O_4$ ( $M = Mn^{2+}, Fe^{2+}, Co^{2+}, Ni^{2+}$ ) ferrite spinel by a modified Bradley reaction

Robert Pązik<sup>1\*</sup>, Emilia Piasecka<sup>1,2</sup>, Małgorzata Małecka<sup>1</sup>, Vadim G. Kessler<sup>3</sup>, B. Idzikowski<sup>4</sup>, Z. Śniadecki<sup>4</sup> and Rafał J. Wiglusz<sup>1\*</sup>

<sup>1</sup>*Institute of Low Temperature and Structure Research, PAS, Okólna 2, 50-422 Wrocław, Poland*

<sup>2</sup>*Polymer Engineering and Technology Division, Wrocław University of Technology, 50-370 Wrocław, Poland*

<sup>3</sup>*Department of Chemistry, SLU, P.O. Box 7015, 750 07 Uppsala, Sweden*

<sup>4</sup>*Institute of Molecular Physics, PAS, M. Smoluchowskiego 17, 60-179 Poznań, Poland*

\*Corresponding authors:

[Robert.Pazik@int.pan.wroc.pl](mailto:Robert.Pazik@int.pan.wroc.pl), [Rafal.Wiglusz@int.pan.wroc.pl](mailto:Rafal.Wiglusz@int.pan.wroc.pl)

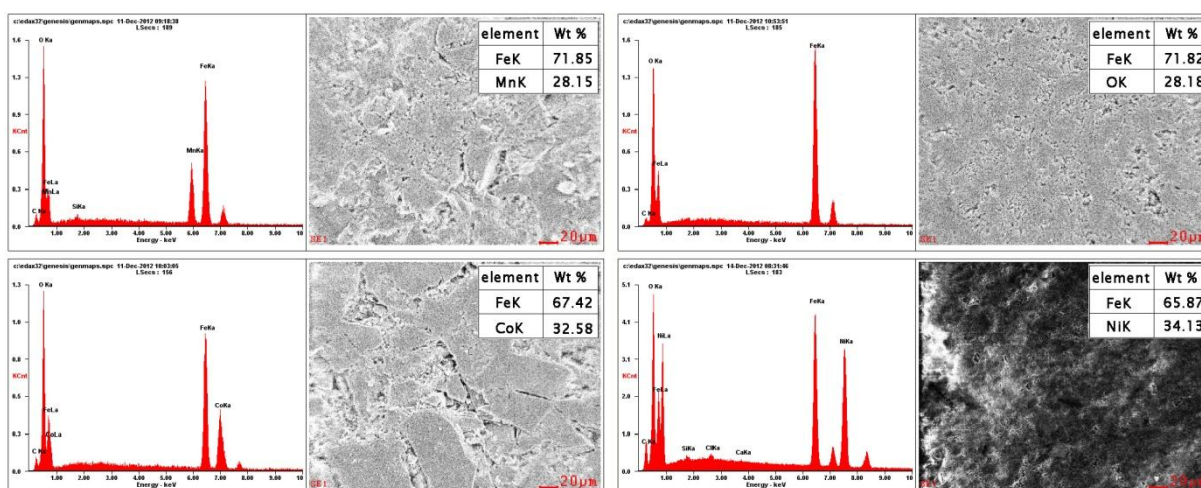

Figure S1. EDS analysis of the  $MFe_2O_4$  series.
